# Supplementary material for: Temperature-controlled morphology evolution of graphitic carbon nitride nanostructures and their photocatalytic activities under visible light
Source: Royal Society of Chemistry journal article supplement (doi:10.1039/c5ra07284k), 2015-01-01
Supplement: c5ra07284k1.pdf [file c5ra07284k1.pdf]

## Electronic Supplementary Information

### Temperature-controlled morphology evolution of graphitic carbon nitride nanostructures and their photocatalytic activities under visible light

Quan Gu <sup>a,b,\*</sup>, Ziwei Gao <sup>a</sup>, Hongan Zhao <sup>b</sup>, Zaizhu Lou <sup>b</sup>, Yusen Liao <sup>b</sup>,  
Can Xue <sup>b,\*</sup>

<sup>a</sup> Key Laboratory of Applied Surface and Colloid Chemistry, Ministry of  
Education, School of Chemistry and Chemical Engineering, Shaanxi  
Normal University, Xi'an, 710062, China,

<sup>b</sup> School of Materials Science and Engineering, Nanyang Technological  
University, 50 Nanyang Avenue, Singapore 639798,

Corresponding Author

\*E-mail: [cxue@ntu.edu.sg](mailto:cxue@ntu.edu.sg)

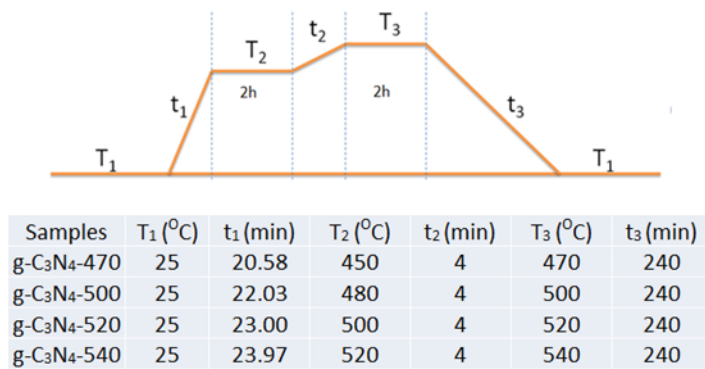

Fig. S1 curve of temperature versus time in polymerization process.

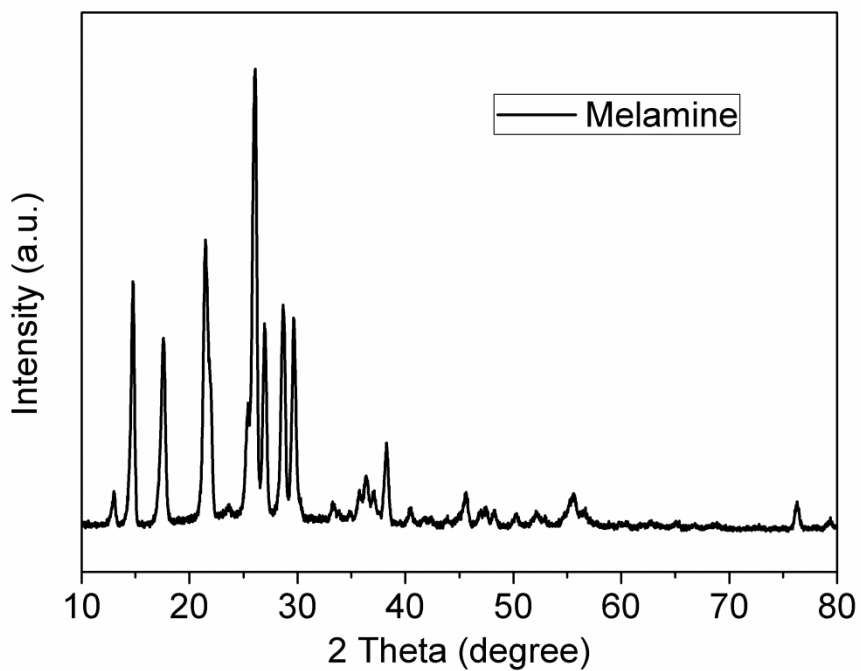

Fig. S2 XRD pattern of melamine.

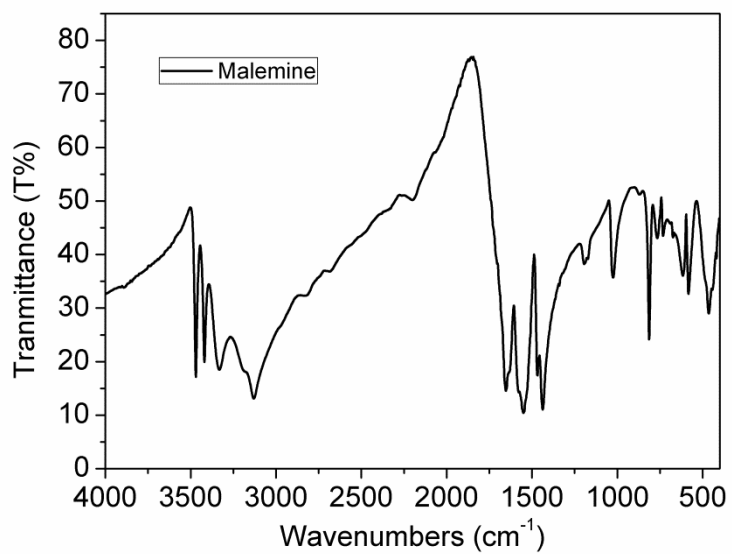

Fig. S3 FTIR spectra of melamine.

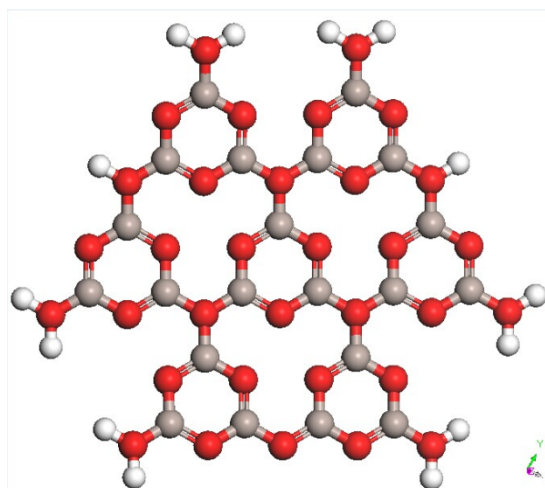

Fig. S4 The perfect structure of graphitic carbon nitride.

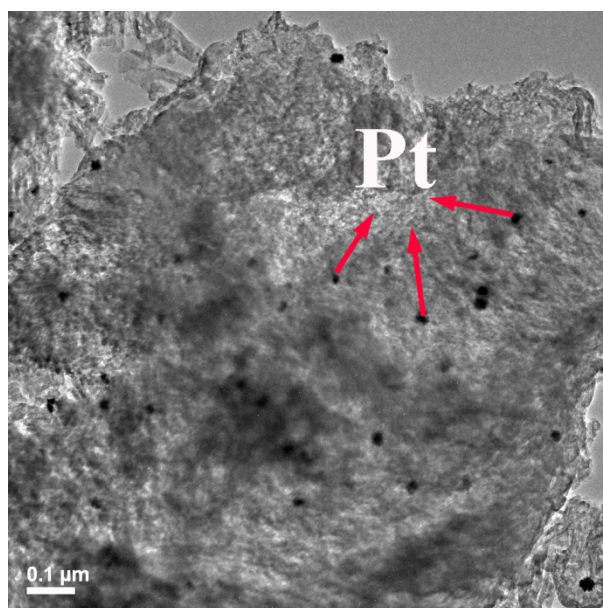

Fig. S5 TEM image of Pt nanoparticles (3 wt.%) loaded g-C<sub>3</sub>N<sub>4</sub> sample.

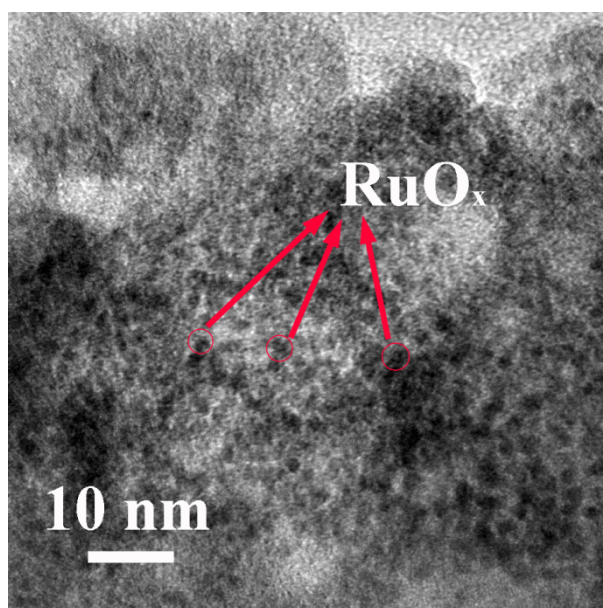

Fig. S6 TEM image of RuO<sub>x</sub> cluster loaded g-C<sub>3</sub>N<sub>4</sub> sample.
